# Supplementary material for: CHRNA7andCHRFAM7AmRNAs: Co-Localized and Their Expression Levels Altered in the Postmortem Dorsolateral Prefrontal Cortex in Major Psychiatric Disorders
Source: Atypon-hosted journal article supplement (doi:10.1176/appi.ajp.2015.14080978), 2015-07-24
Supplement: appi.ajp.2015.14080978.ds001.pdf [file appi.ajp.2015.14080978.ds001.pdf]

## Supplemental Text

### Human brain procedures

Brains were collected through the Offices of the Chief Medical Examiner of the District of Columbia and of Northern Virginia, after autopsy, and through tissue donations via funeral homes mostly from DC, Northern Virginia area. Informed consent to obtain and study brain tissue was obtained from the surviving next-of-kin for all cases, according to Protocol #90-M-0142 approved by the NIMH/National Institutes of Health Institutional Review Board. Interviews with the next-of-kin to gather basic demographic information and medical, substance use, and psychiatric history was conducted, and followed by detailed toxicological analysis. Brains were removed from the skull, wrapped in plastic, and transported on wet ice. The brains were hemisected, cut into 1.5 cm coronal slabs, rapidly frozen in a prechilled dry-ice/isopentane slurry bath ( $-40^{\circ}\text{C}$ ), and stored at  $-80^{\circ}\text{C}$ . A block of lateral superior cerebellar hemisphere was cut transversely to the folia. A portion of cerebellum was pulverized for pH measurement. For the dorsolateral prefrontal cortex dissections, gray matter tissue from the crown of the middle frontal gyrus was obtained from the coronal slab corresponding to the middle one-third immediately anterior to the genu of the corpus callosum. Subcortical white matter was carefully trimmed from the area immediately below the middle frontal gyrus.

### RNA extraction

Total RNA was extracted from  $\sim 100$  mg of tissue using the RNeasy kit (Qiagen, Valencia, CA, USA) according to the manufacturer's protocol. The yield of total RNA was determined by spectrophotometry by measuring the absorbance at 260 nm. The RNA quality was assessed by high-resolution capillary electrophoresis on an Agilent Bioanalyzer 2100 (Agilent Technologies, Palo Alto, CA, USA), samples with RNA integrity number  $< 5$  were excluded. cDNA was created from 4  $\mu\text{g}$  total RNA using SuperScript First-Strand Synthesis System for RT-PCR (Invitrogen, Carlsbad, CA, USA), according to the manufacturer's protocol.

### RNA sequencing and 2bp-deletion results

We used RNA sequencing (RNAseq) to identify 2bp deletion (30). Briefly, after fragmentation of dorsolateral prefrontal cortex RNA, reverse transcriptase and random primers copied the cleaved fragments into first-strand cDNA. Second-strand cDNA was synthesized using T4 DNA polymerase, T4 polynucleotide kinase, and Klenow DNA polymerase, adding a single adenine base using a 3' to 5'  $\text{exo}^{-}$  Klenow fragment, and ligating the paired-end adapters using T4 DNA ligase. An index (up to 12 nucleotides) was inserted into Illumina adapters so multiple samples could be sequenced in 1 lane of an 8-lane flow cell. Products were purified and enriched with polymerase chain reaction (PCR) to create the final cDNA library for high-throughput sequencing using the HiSeq 2000 system (Illumina). Results were mapped to GRCh37/hg19 using the TopHat2 splice-aware alignment software.

We obtained the data for the two-base-pair deletion in exon-6 through RNA sequencing of a subset of samples (controls and schizophrenia,  $N=169$ ). The 2 bp deletion was found in 74 subjects (44 controls, 30 schizophrenia), absent in 95 subjects (42 controls, 53 schizophrenia), and was marginally less common in patients with schizophrenia than controls (36% versus 51%,  $p=0.05$ ), although again this study is underpowered to conduct genetic associations. There was no significant difference in the frequency of 2-bp deletion between Caucasians and African

American subjects. Interestingly, this 2-bp deletion was associated with decreased *CHRFAM7A* mRNA expression (2.4 versus 3.1, by ~26%,  $p=0.0009$ ) and had no association with the expression of *CHRNA7* mRNA,  $p=0.6$ . This deletion had a similar effect in both diagnostic groups (deletion by diagnosis interaction  $F(1,164)=0.95$ ,  $p=0.33$ , n.s.) and in both races (n.s.), and did not account for the observation of increased expression of *CHRFAM7A* or decreased expression of *CHRNA7* in schizophrenia.

**Supplementary Figure S1. Genomic structure of *CHRNA7* and *CHRFAM7A*.**

The *CHRNA7* (red) has 10 exons and exons 5–10 are duplicated. The chimeric gene *CHRFAM7A* is complex and maps centromeric to *CHRNA7*. Horizontal lines depict positions of Taqman assays (Hs01063372\_m1, which measures *CHRNA7* as it spans exons 3–4, and Hs00415199\_m1, which is specific for the hybrid gene *CHRFAM7A* as it spans exons 1–2).

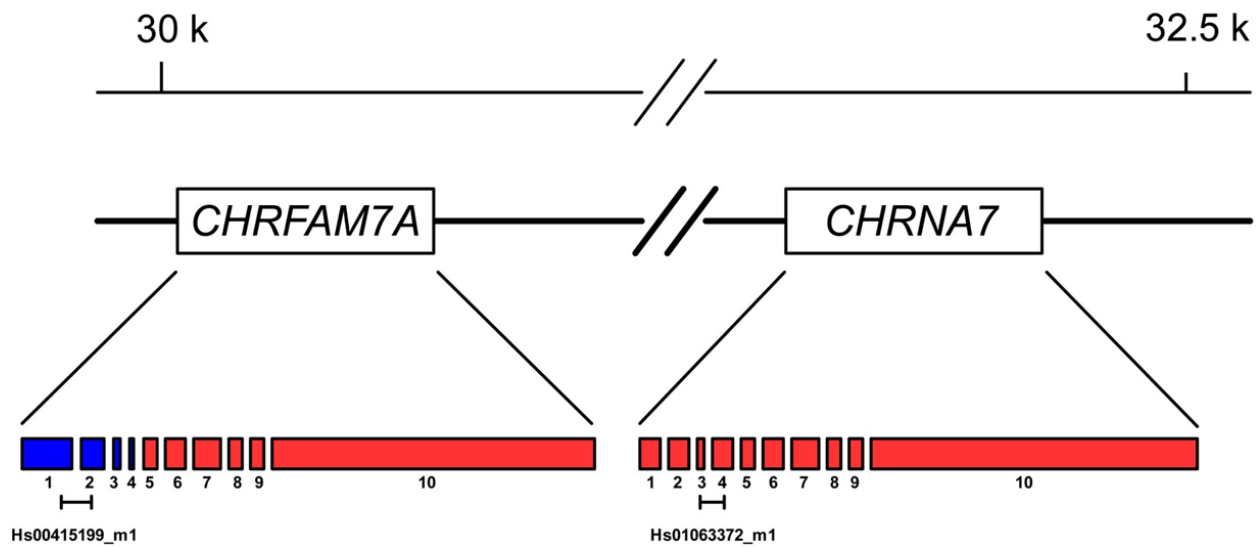

**Supplementary Table S1. A list of SNPs tested for association with expression of *CHRNA7* and *CHRFAM7A*. None of the SNPs showed significant association after correction for multiple testing ( $p<0.05$ )**

| Chr | SNP Name   | Position | Alleles |
|-----|------------|----------|---------|
| 15  | rs8039109  | 30012769 | [T/C]   |
| 15  | rs4435224  | 30016600 | [A/G]   |
| 15  | rs2137856  | 30016646 | [T/C]   |
| 15  | rs6494074  | 30025001 | [A/G]   |
| 15  | rs12442954 | 30029658 | [A/C]   |
| 15  | rs11636570 | 30044127 | [A/C]   |
| 15  | rs8035113  | 30044699 | [A/G]   |
| 15  | rs12442622 | 30045195 | [A/G]   |
| 15  | rs4779948  | 30046352 | [T/C]   |
| 15  | rs952284   | 30054781 | [A/C]   |
| 15  | rs10152238 | 30057610 | [T/C]   |

|              |          |       |
|--------------|----------|-------|
| 15rs4779561  | 30057740 | [A/G] |
| 15rs12442631 | 30058418 | [T/C] |
| 15rs1567883  | 30060176 | [A/C] |
| 15rs1001555  | 30060958 | [A/G] |
| 15rs11636101 | 30061449 | [T/G] |
| 15rs11636810 | 30067518 | [A/G] |
| 15rs12437782 | 30071854 | [A/C] |
| 15rs12440180 | 30072148 | [T/C] |
| 15rs8038654  | 30072156 | [T/C] |
| 15rs1399195  | 30077139 | [A/G] |
| 15rs2063722  | 30083665 | [T/G] |
| 15rs8036290  | 30083979 | [T/C] |
| 15rs1514260  | 30086242 | [T/C] |
| 15rs7168113  | 30087000 | [A/G] |
| 15rs1567887  | 30087245 | [A/G] |
| 15rs1567885  | 30088094 | [T/C] |
| 15rs7180085  | 30090949 | [T/C] |
| 15rs2337233  | 30094507 | [A/G] |
| 15rs12439621 | 30096476 | [A/G] |
| 15rs4779955  | 30097303 | [A/G] |
| 15rs8026970  | 30098960 | [T/C] |
| 15rs965434   | 30104934 | [T/C] |
| 15rs6494165  | 30108578 | [T/G] |
| 15rs3826029  | 30108777 | [A/G] |
| 15rs883473   | 30112968 | [A/G] |
| 15rs1606659  | 30119745 | [T/C] |
| 15rs11635209 | 30121289 | [T/C] |
| 15rs11071503 | 30122248 | [A/G] |
| 15rs9672321  | 30131481 | [T/C] |
| 15rs1913457  | 30133278 | [A/G] |
| 15rs4779969  | 30136223 | [A/C] |
| 15rs11071515 | 30136799 | [A/G] |
| 15rs11637923 | 30138067 | [T/C] |
| 15rs1355920  | 30145020 | [A/G] |
| 15rs2337507  | 30146417 | [T/C] |
| 15rs8027035  | 30149996 | [A/G] |
| 15rs7179733  | 30160985 | [A/G] |
| 15rs8033518  | 30168901 | [A/G] |
| 15rs7175581  | 30172759 | [A/G] |

|              |          |       |
|--------------|----------|-------|
| 15rs4779565  | 30177362 | [T/G] |
| 15rs8035668  | 30178638 | [T/C] |
| 15rs6494223  | 30183749 | [T/C] |
| 15rs8028396  | 30184013 | [A/G] |
| 15rs10438342 | 30189338 | [A/G] |
| 15rs11858834 | 30190213 | [A/G] |
| 15rs11852956 | 30190622 | [A/G] |
| 15rs13329490 | 30195523 | [T/G] |
| 15rs12915265 | 30196358 | [T/C] |
| 15rs1392808  | 30198807 | [A/C] |
| 15rs904951   | 30205330 | [T/C] |
| 15rs12904458 | 30207080 | [T/C] |
| 15rs4779978  | 30207700 | [T/C] |
| 15rs7175359  | 30212239 | [A/G] |
| 15rs2651418  | 30226573 | [T/C] |
| 15rs1909884  | 30226590 | [A/G] |
| 15rs2611603  | 30228824 | [T/G] |
| 15rs2611605  | 30228925 | [A/G] |
| 15rs7179008  | 30231215 | [T/C] |
| 15rs2337980  | 30231488 | [T/C] |
| 15rs2926504  | 30297184 | [A/G] |
| 15rs4072398  | 30297802 | [A/G] |
| 15rs9672615  | 30298847 | [A/C] |
| 15rs2946542  | 30300468 | [A/G] |
| 15rs2946543  | 30300525 | [A/G] |
| 15rs9672198  | 30301189 | [A/G] |
| 15rs9672221  | 30301442 | [T/G] |
| 15rs2611583  | 30301633 | [A/G] |
| 15rs4779984  | 30302218 | [A/G] |
| 15rs11637116 | 30302973 | [A/G] |
| 15rs2946544  | 30303265 | [T/C] |

<sup>a</sup> Genotyping of 81 *CHRNA7* SNPs was performed according to the manufacturer's instructions, using Illumina Human 1M-Duo BeadChips (Illumina Inc., San Diego, CA). Two SNPs previously examined but not associated with schizophrenia (16) were highlighted in fluorescent yellow.
